# Supplementary material for: Transparent silphenylene elastomers from highly branched monomers
Source: Royal Society of Chemistry journal article supplement (doi:10.1039/d0py01148g), 2020-11-19
Supplement: d0py01148g1.pdf [file d0py01148g1.pdf]

## Transparent Silphenylene Elastomers from Highly Branched Monomers

Shuai Liang,<sup>a</sup> Michael Yin Wong,<sup>a</sup> Alyssa Schneider,<sup>a</sup> Mengchen Liao,<sup>a</sup> Gertrud Kräuter,<sup>b</sup> Maxim N. Tchoul,<sup>c</sup> Yang Chen<sup>a</sup> and Michael A. Brook<sup>\*a</sup>

### Electronic Supporting Information

#### Table of Contents

|                                                                                                                                                                                                                                                   |    |
|---------------------------------------------------------------------------------------------------------------------------------------------------------------------------------------------------------------------------------------------------|----|
| FIGURE S1. IR SPECTRA FOR MONOMER LINEAR ALTERNATING POLYMER <b>4</b> AND THE ELASTOMER <b>5</b> PREPARED BY CURING <b>4</b> WITH (OCTO) <sub>3</sub> SiMe AS CROSSLINKER, Y = Me (FIGURE 2).....                                                 | 2  |
| FIGURE S2. THERMAL BEHAVIOR OF THE ELASTOMERS <b>5</b> . A: TGA IN AIR OF THE ELASTOMERS <b>5</b> OF VARIOUS BASE MATERIALS <b>4</b> . B: DSC SHOWING DEGRADATION OF THE ELASTOMERS <b>5</b> OF VARIOUS BASE MATERIALS <b>4</b> (FIGURE 2). ..... | 3  |
| FIGURE S3. IR SPECTRA OF CURED PRODUCT OF <b>7</b> → <b>10</b> AFTER HEATING AT 250 °C FOR 10 H.....                                                                                                                                              | 4  |
| FIGURE S4. CHANGES IN <b>7</b> DURING CROSSLINKING → <b>10</b> WITH HEATING AT 250 °C VIA FT-IR.....                                                                                                                                              | 4  |
| FIGURE S5. CHANGES IN <b>7</b> DURING CROSSLINKING → <b>10</b> WITH HEATING AT 250 °C VIA <sup>1</sup> H NMR. ....                                                                                                                                | 5  |
| FIGURE S6. CURED PRODUCT OF <b>8</b> → <b>11</b> AFTER HEATING AT 250 °C FOR 10 H.....                                                                                                                                                            | 5  |
| FIGURE S7. CHANGES IN <b>8</b> DURING CROSSLINKING → <b>11</b> WITH HEATING AT 250 °C VIA FT-IR.....                                                                                                                                              | 6  |
| FIGURE S8. CHANGES IN <b>8</b> WITH DURING CROSSLINKING → <b>11</b> WITH HEATING AT 250 °C VIA <sup>1</sup> H NMR. ....                                                                                                                           | 6  |
| FIGURE S9. TRANSMITTANCE DATE FOR ELASTOMERS <b>9-11</b> . ....                                                                                                                                                                                   | 7  |
| FIGURE S10. THERMAL BEHAVIOR OF THE MONOMER <b>7</b> AND ELASTOMER <b>10</b> . A: DSC UNDER ARGON OF THE MONOMER <b>7</b> AND ELASTOMER <b>10</b> . B: TGA IN AIR SHOWING DEGRADATION OF THE MONOMER <b>7</b> AND ELASTOMER <b>10</b> .....       | 7  |
| FIGURE S11. THERMAL BEHAVIOR OF THE MONOMER <b>8</b> AND ELASTOMER <b>11</b> . A: DSC UNDER ARGON OF THE MONOMER <b>8</b> AND ELASTOMER <b>11</b> . B: TGA SHOWING DEGRADATION IN AIR OF THE MONOMER <b>8</b> AND ELASTOMER <b>11</b> .....       | 7  |
| FIGURE S12. <sup>1</sup> H NMR SPECTRA FOR COMPOUND <b>2</b> . ....                                                                                                                                                                               | 8  |
| FIGURE S13. <sup>1</sup> H NMR SPECTRA FOR COMPOUND <b>3</b> . ....                                                                                                                                                                               | 8  |
| FIGURE S14. <sup>1</sup> H NMR SPECTRA FOR COMPOUND <b>4A</b> . ....                                                                                                                                                                              | 9  |
| FIGURE S15. <sup>1</sup> H NMR SPECTRA FOR COMPOUND <b>4B</b> . ....                                                                                                                                                                              | 9  |
| FIGURE S16. <sup>1</sup> H NMR SPECTRA FOR COMPOUND <b>6</b> . ....                                                                                                                                                                               | 10 |
| FIGURE S17. <sup>13</sup> C NMR SPECTRA FOR COMPOUND <b>6</b> . ....                                                                                                                                                                              | 10 |
| FIGURE S18. <sup>29</sup> Si NMR SPECTRA FOR COMPOUND <b>6</b> .....                                                                                                                                                                              | 11 |
| FIGURE S19. <sup>1</sup> H NMR SPECTRA FOR COMPOUND <b>7</b> . ....                                                                                                                                                                               | 12 |
| FIGURE S20. <sup>13</sup> C NMR SPECTRA FOR COMPOUND <b>7</b> . ....                                                                                                                                                                              | 12 |
| FIGURE S21. <sup>29</sup> Si NMR SPECTRA FOR COMPOUND <b>7</b> .....                                                                                                                                                                              | 13 |
| FIGURE S22. <sup>1</sup> H NMR SPECTRA FOR COMPOUND <b>8</b> . ....                                                                                                                                                                               | 13 |
| FIGURE S23. <sup>13</sup> C NMR SPECTRA FOR COMPOUND <b>8</b> . ....                                                                                                                                                                              | 14 |
| FIGURE S24. <sup>29</sup> Si NMR SPECTRA FOR COMPOUND <b>8</b> .....                                                                                                                                                                              | 14 |
| FIGURE S25. ELASTOMER SYNTHESIS USING DIFFERENT SILPHENYLENE RESIN PRECURSORS .....                                                                                                                                                               | 15 |

## Synthesis of Linear Polysilphenylene with a Dimethylsiloxane or Phenylmethyl Spacer 4

To an oven-dried 20 mL vial was added 1,4-bis(dimethyl)silyl benzene (7.04 g, 36.2 mmol), dimethyldiethoxysilane (5.37 g, 36.2) and a stir bar. This reagent solution was allowed to stir for 5 min. To an oven-dried 250 mL two necked round-bottomed flask containing a stir bar was added the reagent solution (3 mL) and  $B(C_6F_5)_3$  (50  $\mu$ L, 10mg/mL solution in toluene). Every 30 min additional reagent solution (3 mL) and  $B(C_6F_5)_3$  (20  $\mu$ L, 10mg/mL solution in toluene) were added to the two necked round-bottomed flask until all the reagent solution was consumed. 1,4-Bis(dimethyl)silylbenzene (1 mL, 4.50 mmol) was added to reaction mixture. From time to time a small aliquot was removed and analyzed by  $^1H$  NMR to confirm the presence of SiH end groups and absence of SiOEt end groups. The reaction mixture was quenched with neutral alumina ( $\sim$ 0.5 g), gravity filtered and concentrated under reduced pressure. The linear  $Me_2SiO$ -co-silphenylene silicone product **4a** was purified by removal of volatiles using kugelrohr distillation at 200  $^\circ$ C under reduced pressure. The polymer product was a viscous, colorless oil.  $^1H$ -NMR (600 MHz,  $CDCl_3$ )  $\delta$  7.55-7.54 (m, 228 H), 4.43 (sept,  $J$ = 3.8 Hz, 2 H), 0.34-0.32 (m, 693 H), 0.07-0.06 (m, 247 H). GPC:  $M_n$ =19,320,  $M_w$ =36,760,  $D_M$ =1.90.

The same process could be used to make analogous compounds with a **Phenylmethyl Spacer**: 1,4-bis(dimethyl)silyl benzene (5.45g, 28.0 mmol), diethoxymethylphenylsilane (5.89 g, 28.0 mmol). The linear  $PhMeSiO$ -co-silphenylene silicone **4b** was purified using kugelrohr distillation at 200  $^\circ$ C under reduced pressure. Polymer product was a viscous, colorless oil.  $^1H$ -NMR (600 MHz,  $CDCl_3$ )  $\delta$  7.54-7.27 (m, 110 H), 7.36-7.27 (m, 20 H), 7.25-7.17 (m, 17 H), 7.22 (sep, 2 H, 3.8 Hz), 0.35-0.19 (m, 237 H). GPC:  $M_n$ =8949,  $M_w$ =16097,  $D_M$ =1.80.

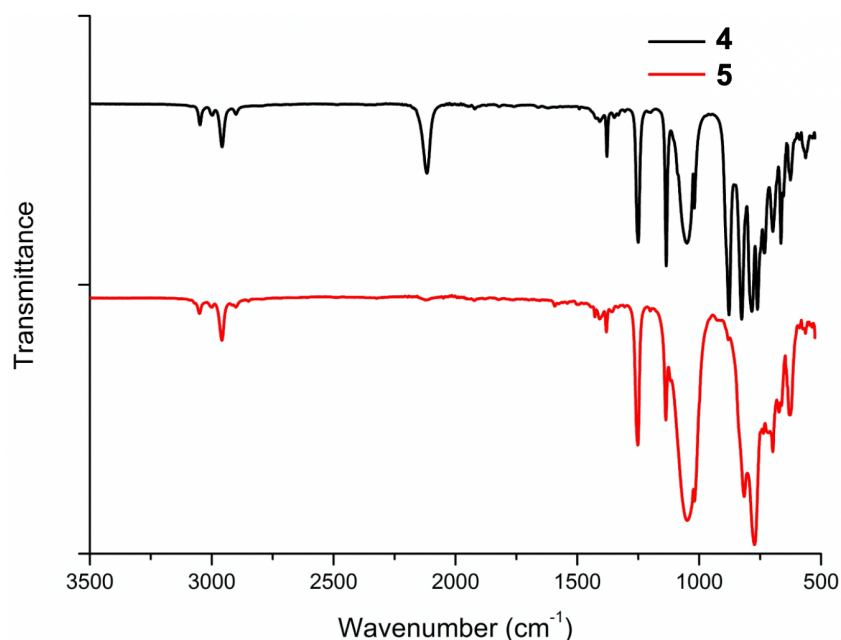

Figure S1. IR spectra for monomer linear alternating polymer **4** and the elastomer **5** prepared by curing **4** with  $(OctO)_3SiMe$  as crosslinker,  $Y = Me$  (Figure 2).

A

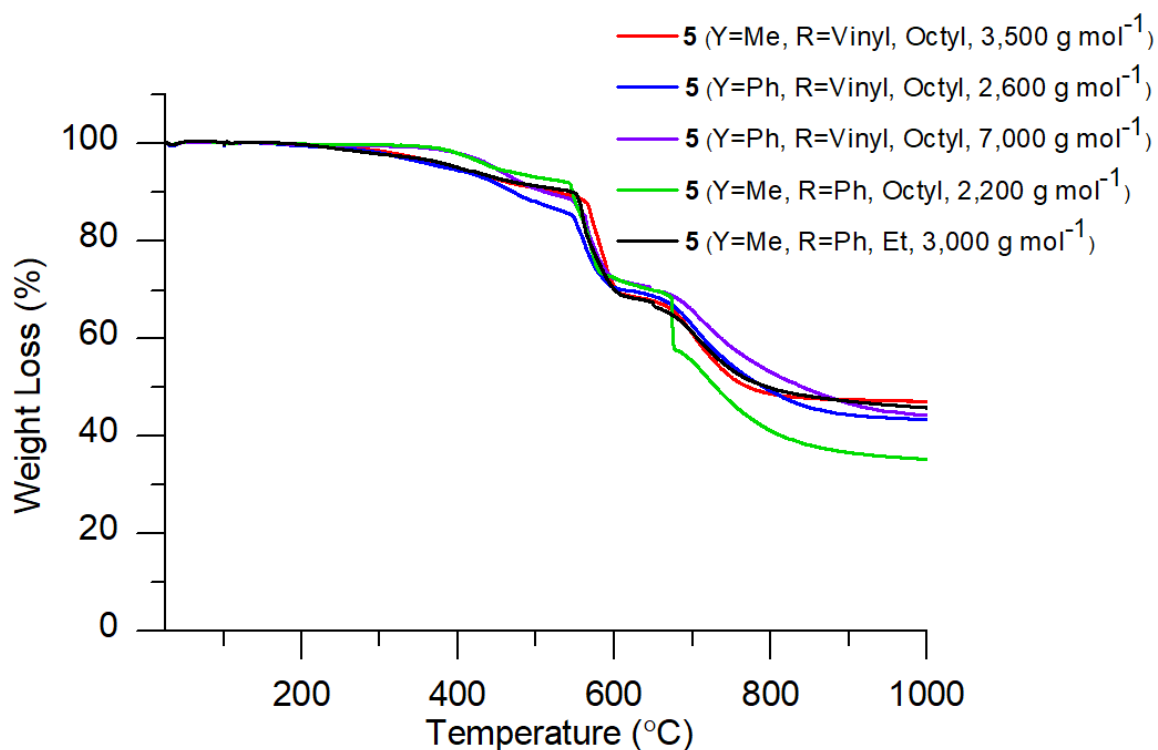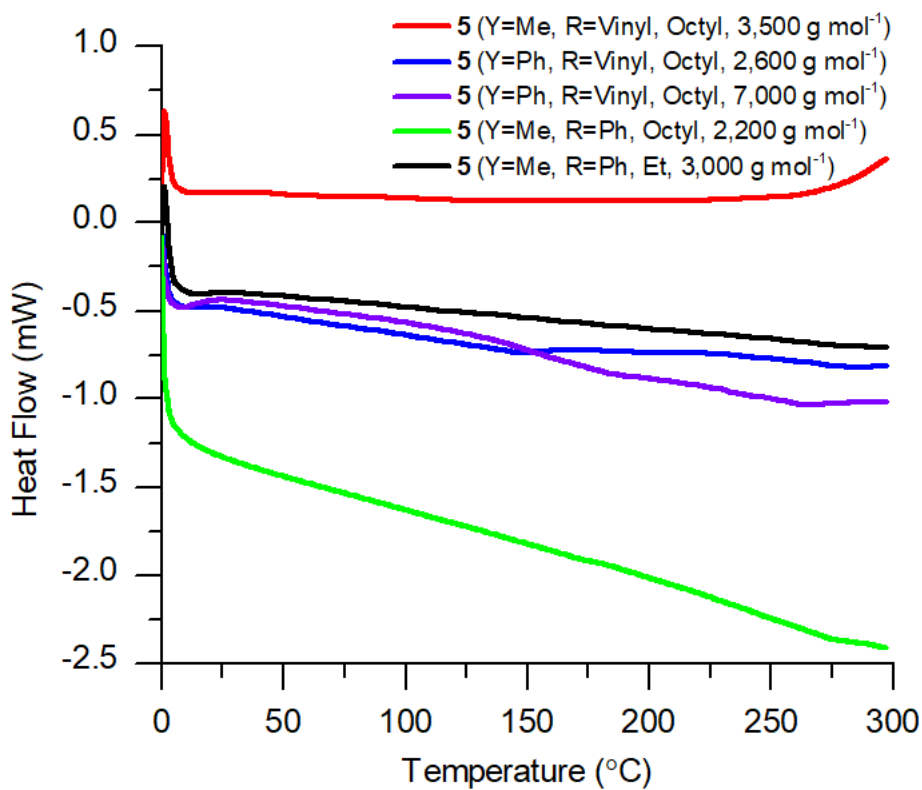

B

Figure S2. Thermal behavior of the elastomers 5. A: TGA in air of the elastomers 5 of various base materials 4. B: DSC showing degradation of the elastomers 5 of various base materials 4 (Figure 2).

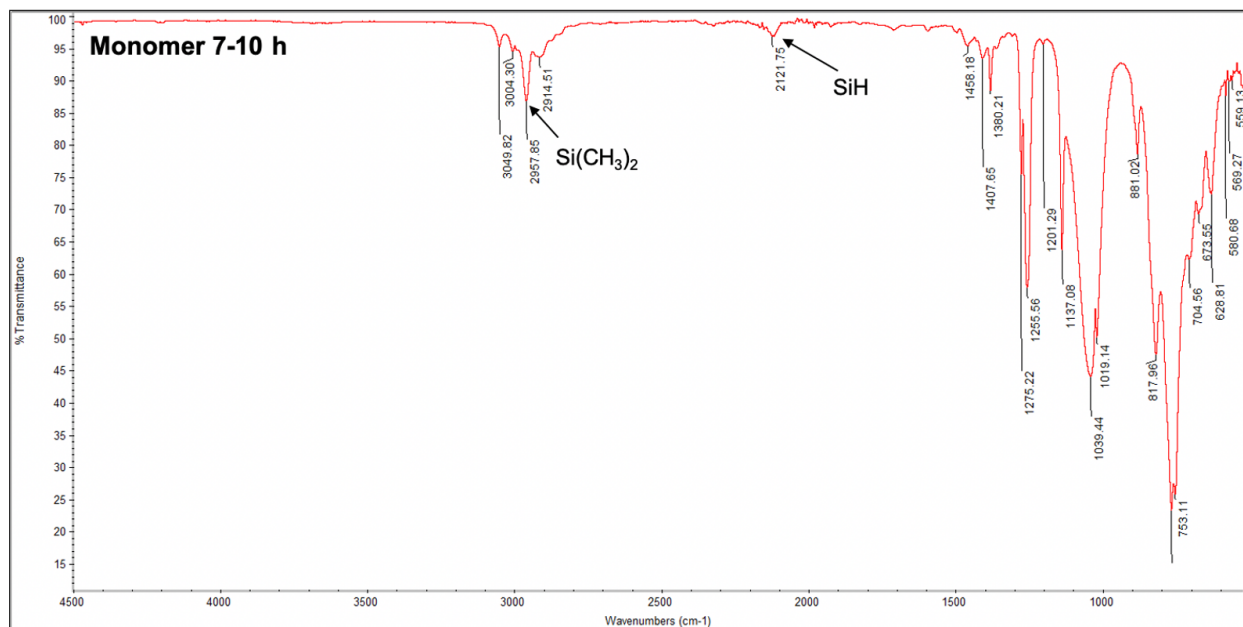

Figure S3. IR spectra of cured product of **7** → **10** after heating at 250 °C for 10 h.

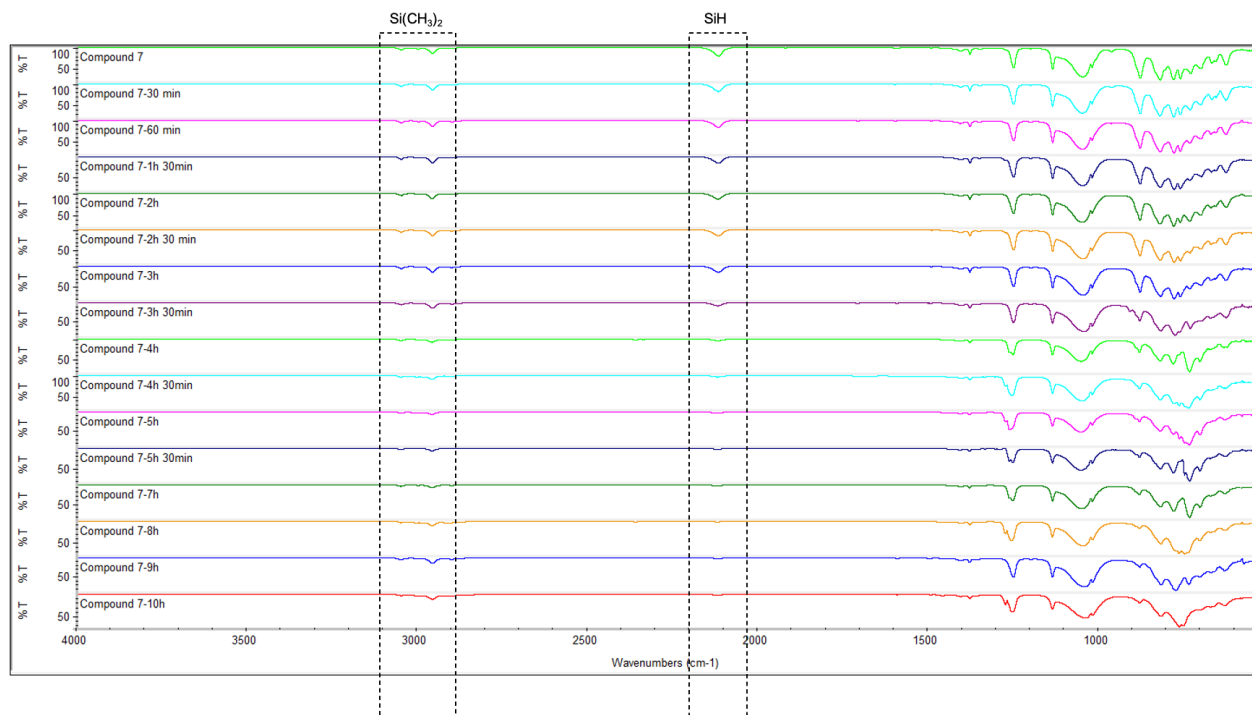

Figure S4. Changes in **7** during crosslinking → **10** with heating at 250 °C via FT-IR.

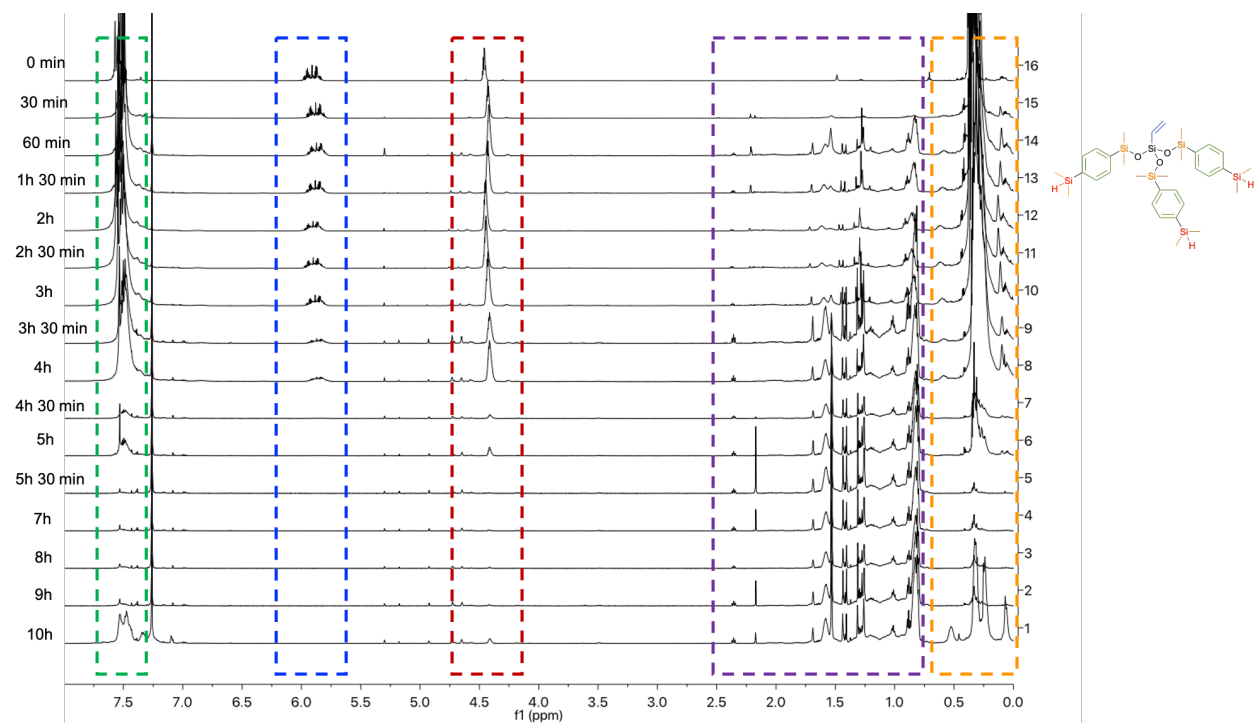

Figure S5. Changes in **7** during crosslinking  $\rightarrow$  **10** with heating at 250 °C via  $^1\text{H}$  NMR.

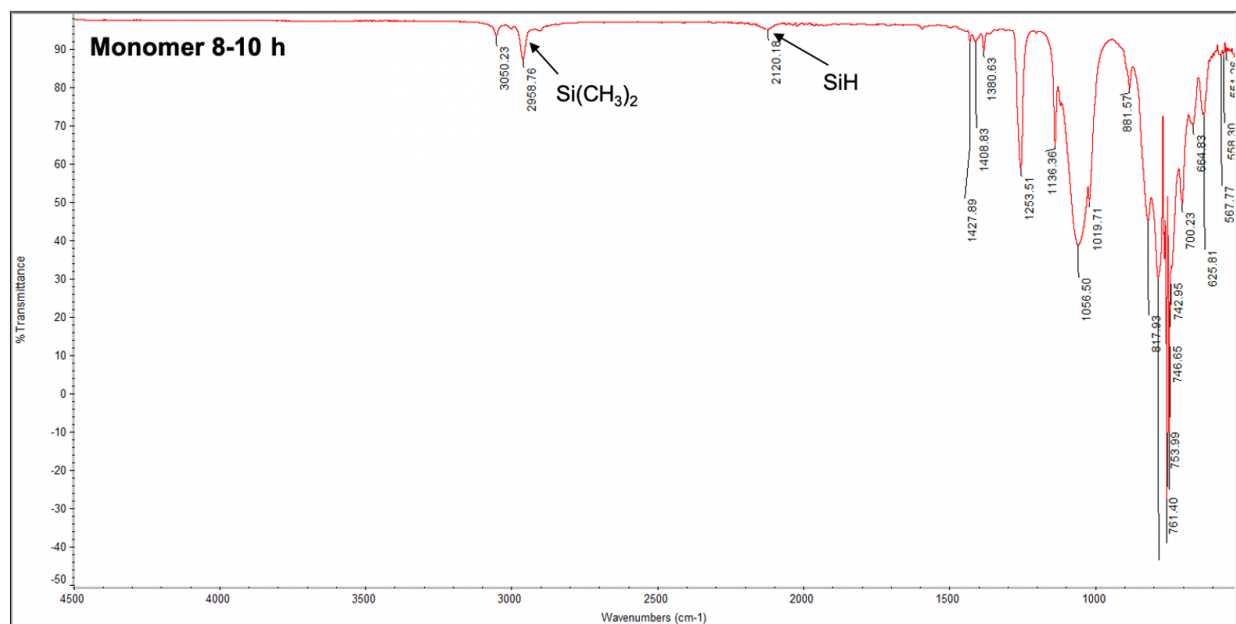

Figure S6. Cured product of **8**  $\rightarrow$  **11** after heating at 250 °C for 10 h.

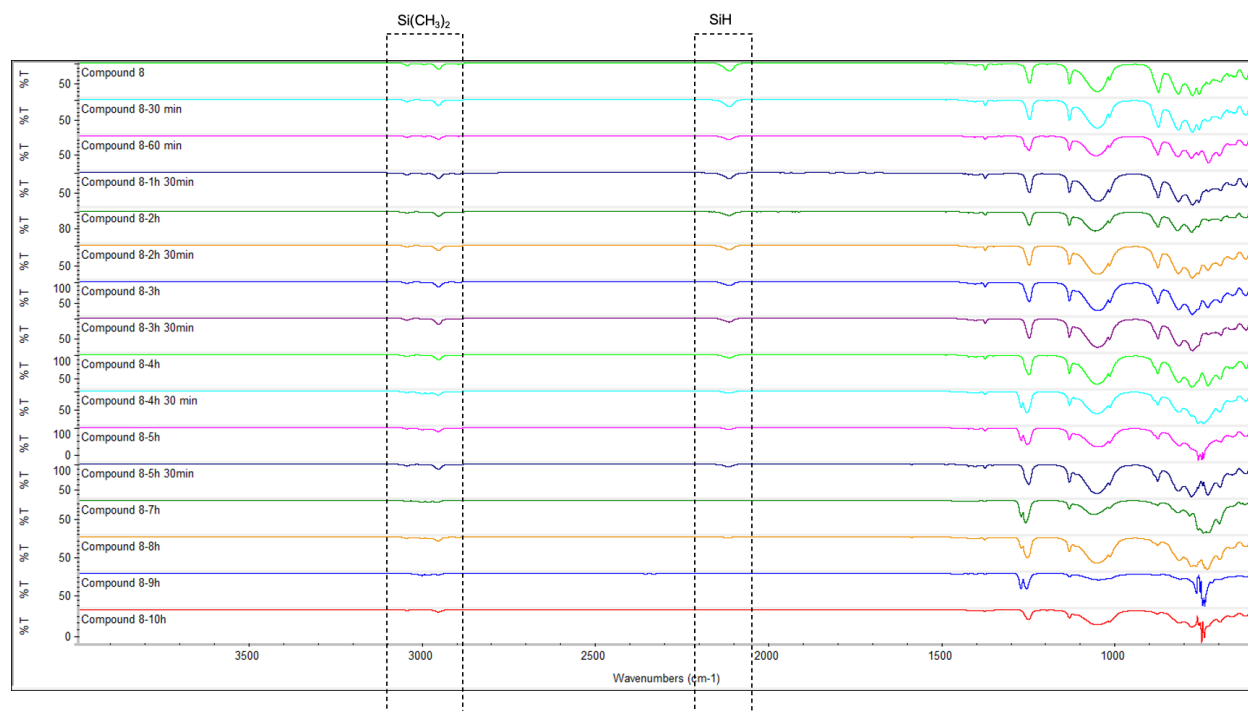

Figure S7. Changes in **8** during crosslinking  $\rightarrow$  **11** with heating at 250 °C via FT-IR.

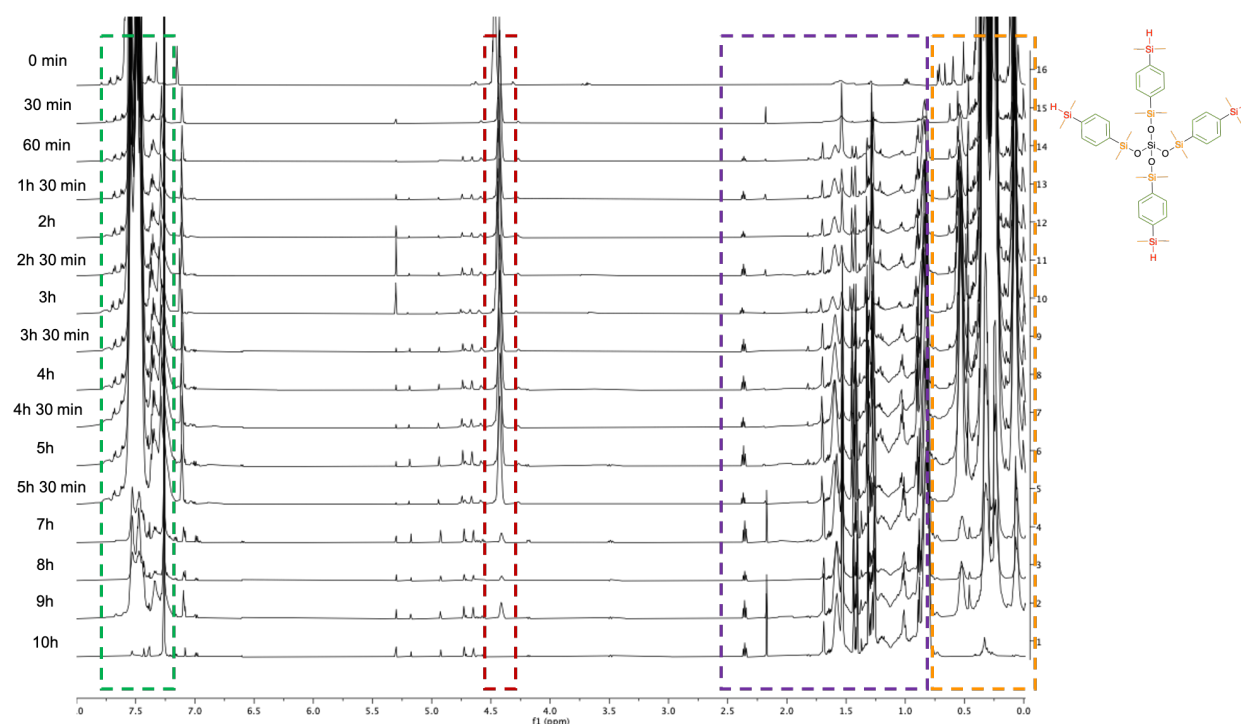

Figure S8. Changes in **8** with during crosslinking  $\rightarrow$  **11** with heating at 250 °C via  $^1\text{H}$  NMR.

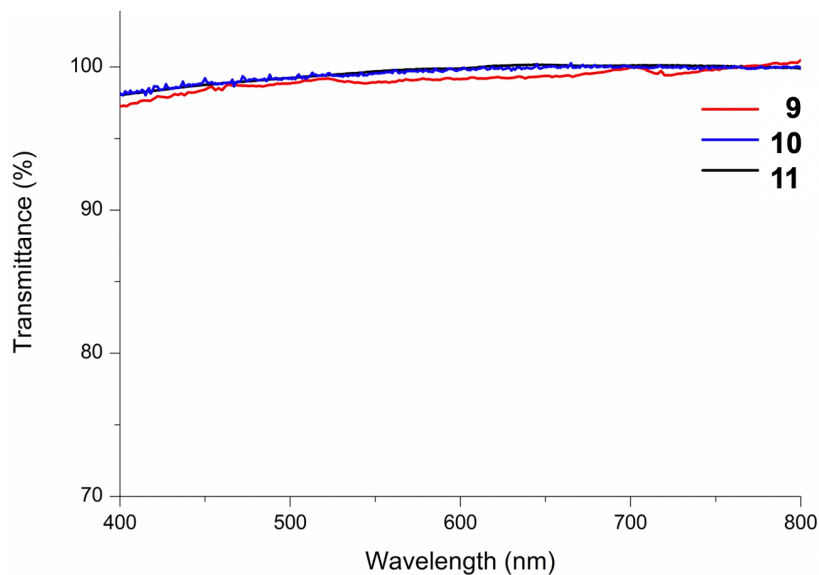

Figure S9. Transmittance data for elastomers **9-11**.

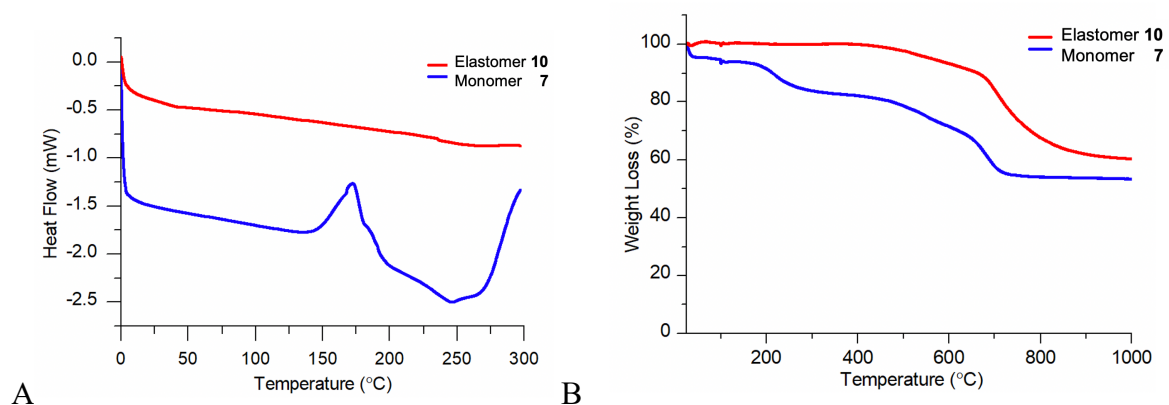

Figure S10. Thermal behavior of the monomer **7** and elastomer **10**. A: DSC under argon of the monomer **7** and elastomer **10**. B: TGA in air showing degradation of the monomer **7** and elastomer **10**.

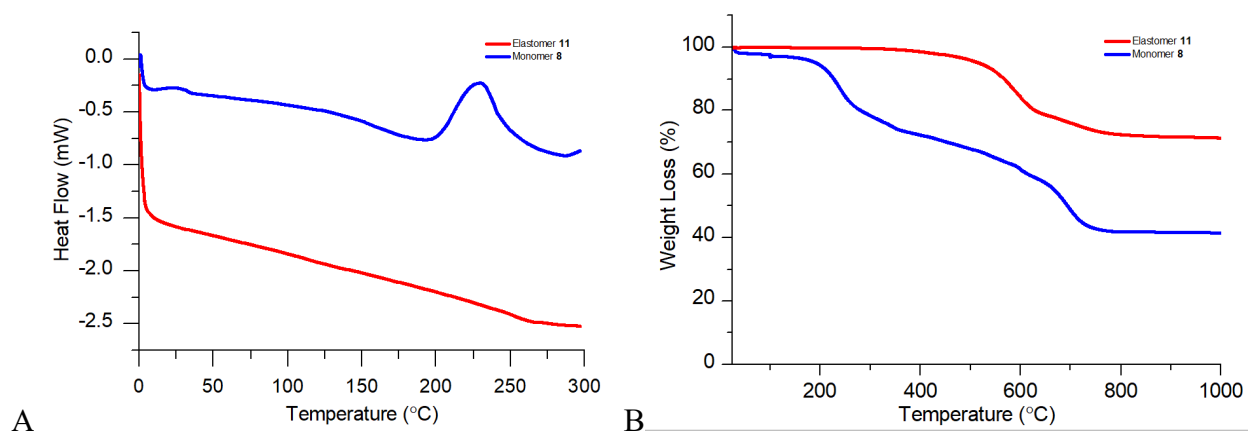

Figure S11. Thermal behavior of the monomer **8** and elastomer **11**. A: DSC under argon of the monomer **8** and elastomer **11**. B: TGA showing degradation in air of the monomer **8** and elastomer **11**.

### Compound 2

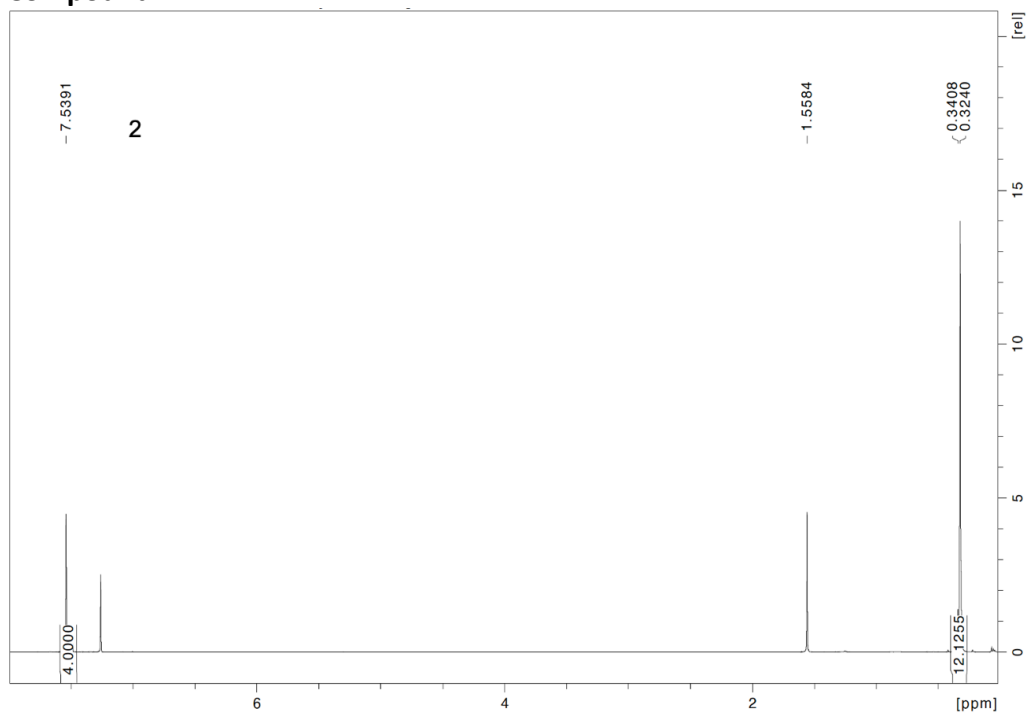

Figure S12. <sup>1</sup>H NMR spectra for compound **2**.

### Compound 3

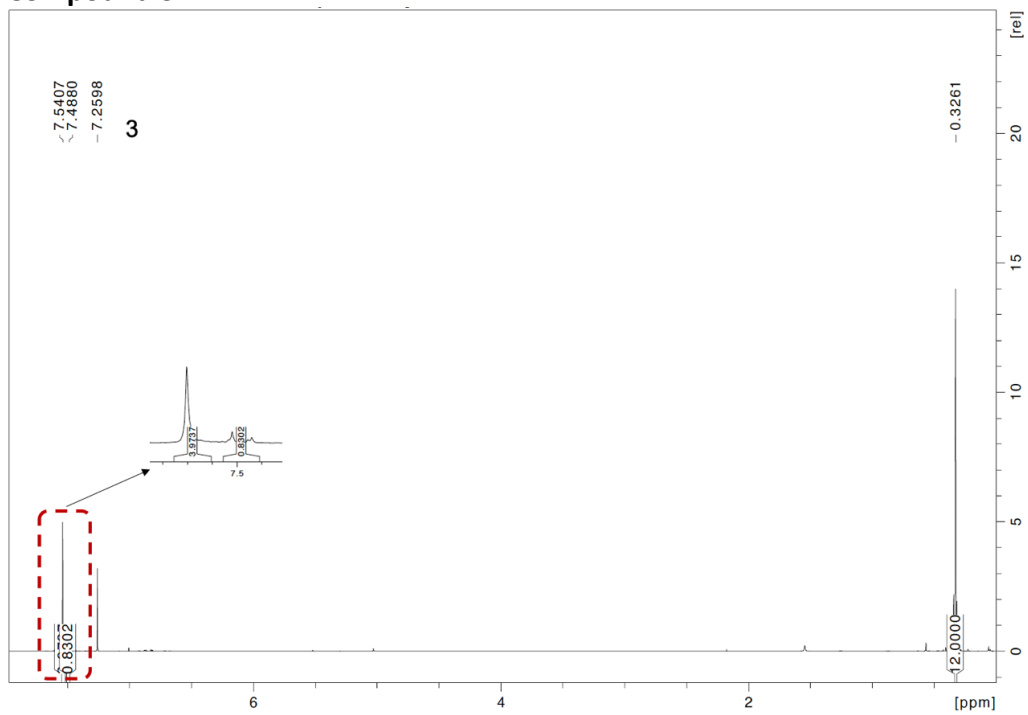

Figure S13. <sup>1</sup>H NMR spectra for compound **3**.



**4a**

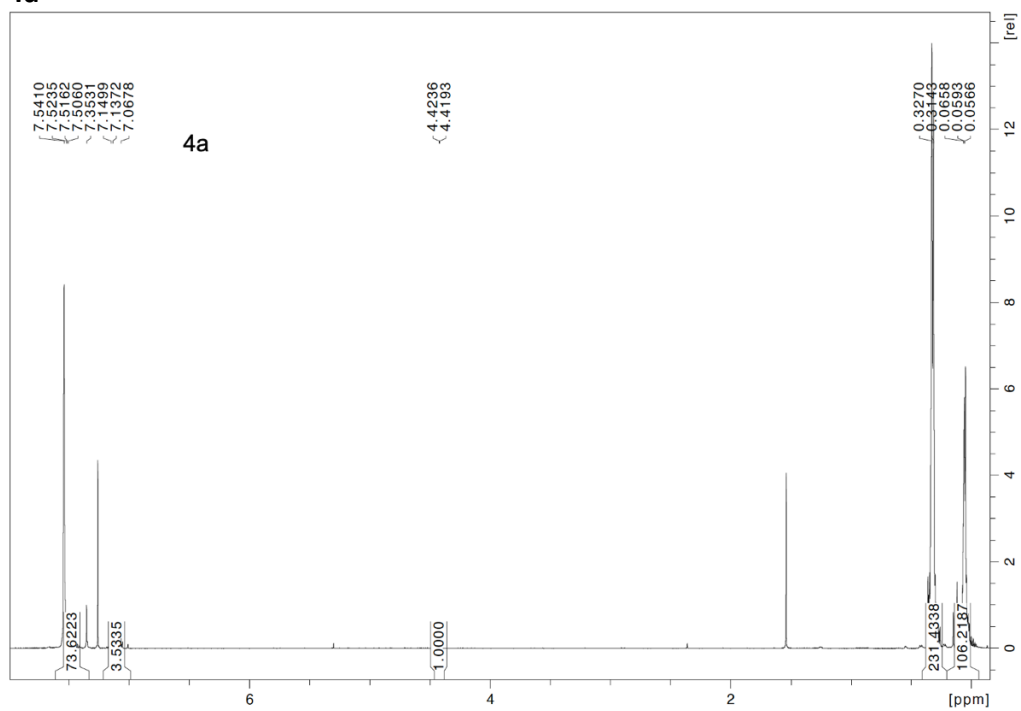

Figure S14. <sup>1</sup>H NMR spectra for compound **4a**.

**4b**

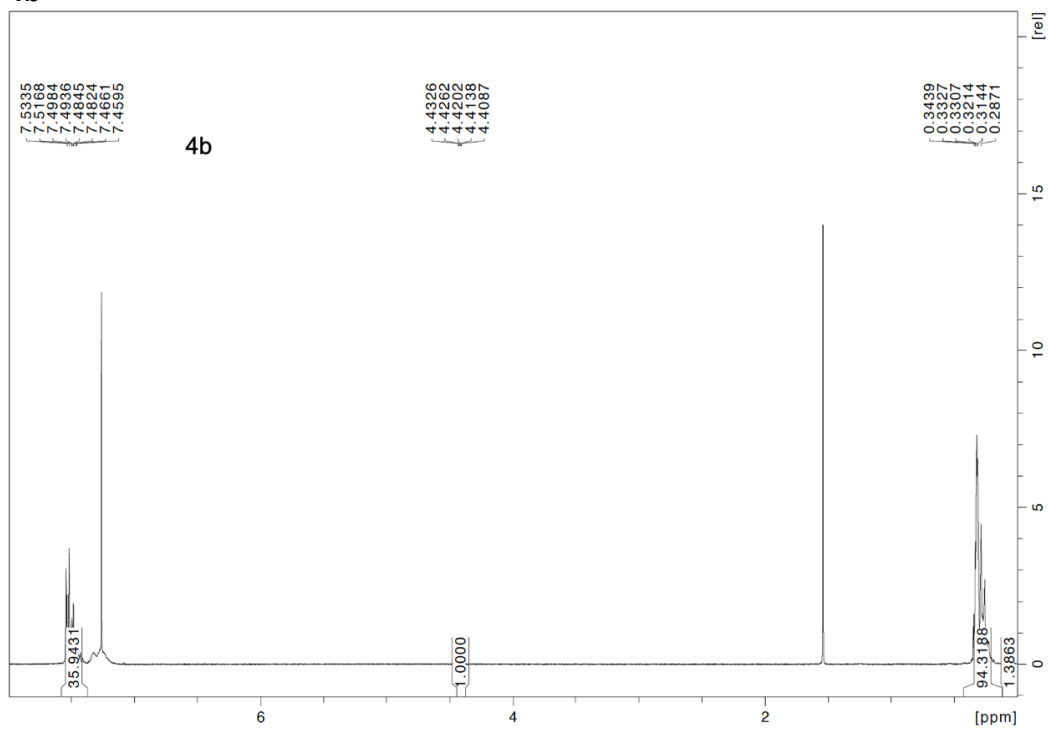

Figure S15. <sup>1</sup>H NMR spectra for compound **4b**.

Compound 6, R = CH<sub>3</sub>

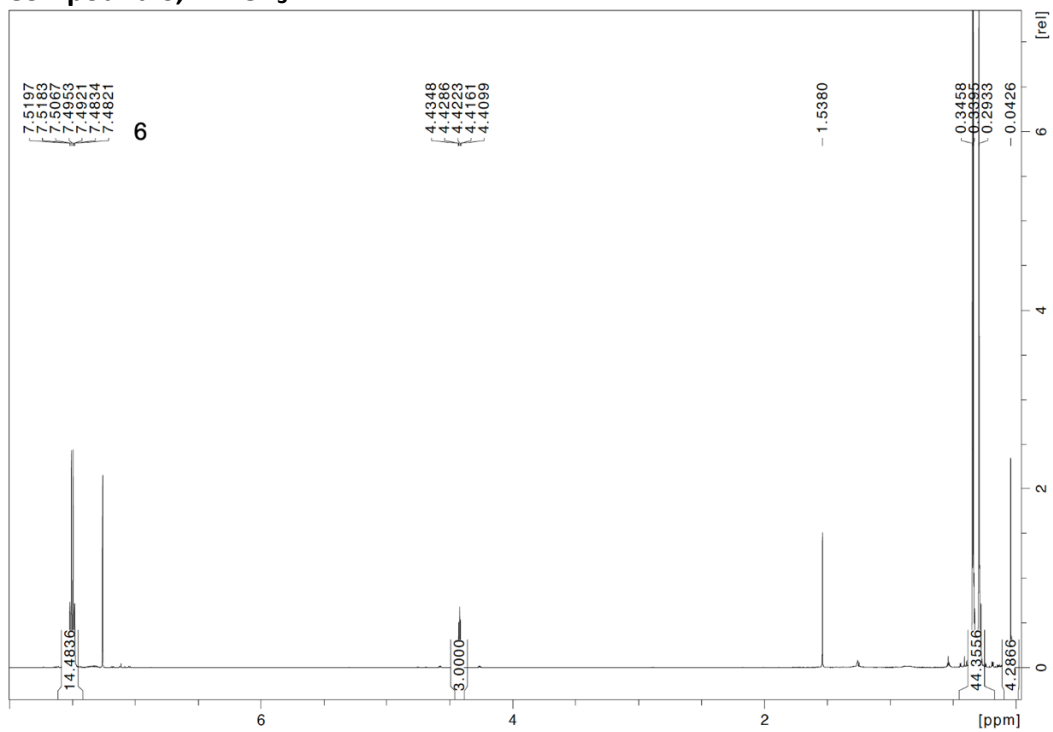

Figure S16. <sup>1</sup>H NMR spectra for compound **6**.

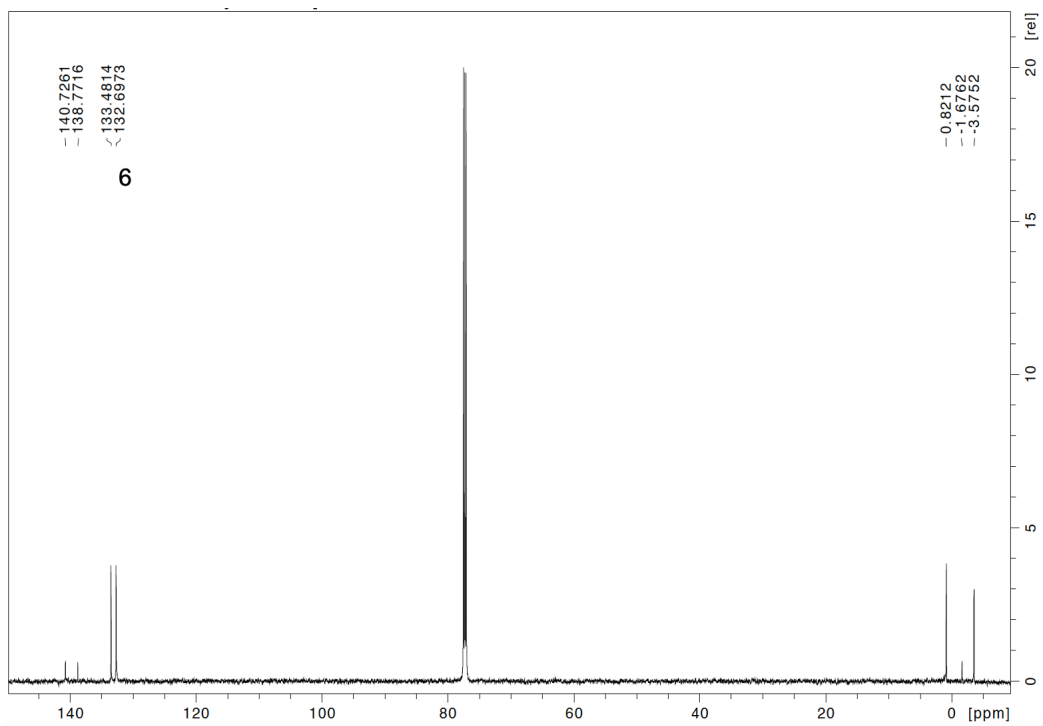

Figure S17. <sup>13</sup>C NMR spectra for compound **6**.

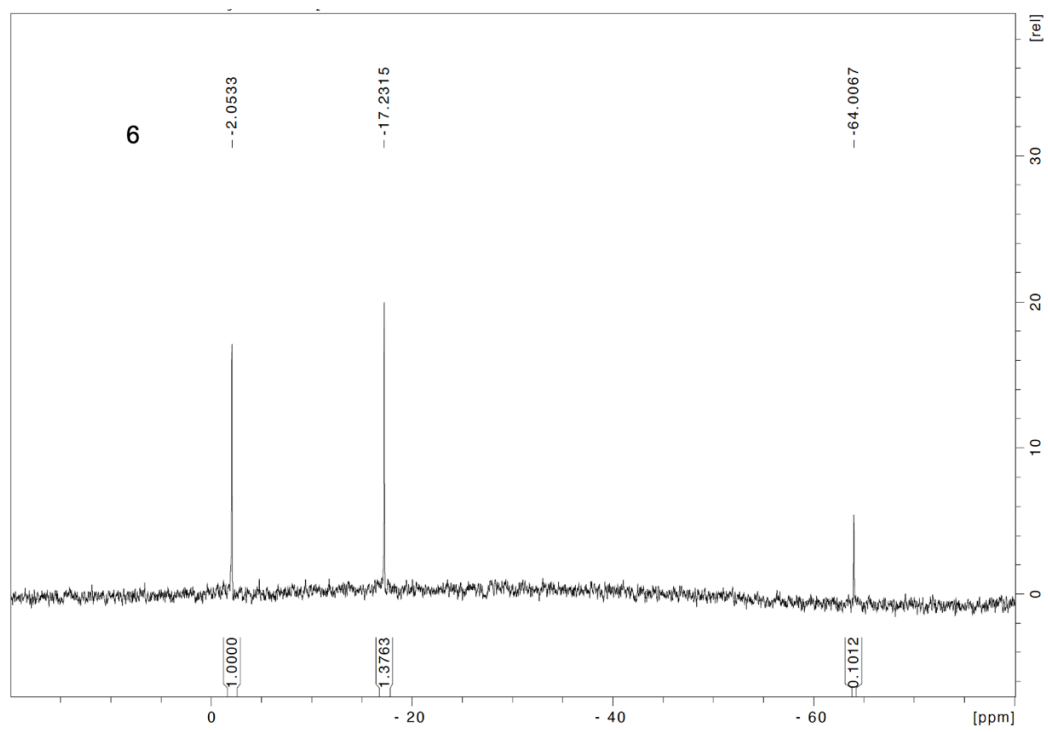

Figure S18.  $^{29}\text{Si}$  NMR spectra for compound **6**.

Compound 7, R= Vinyl

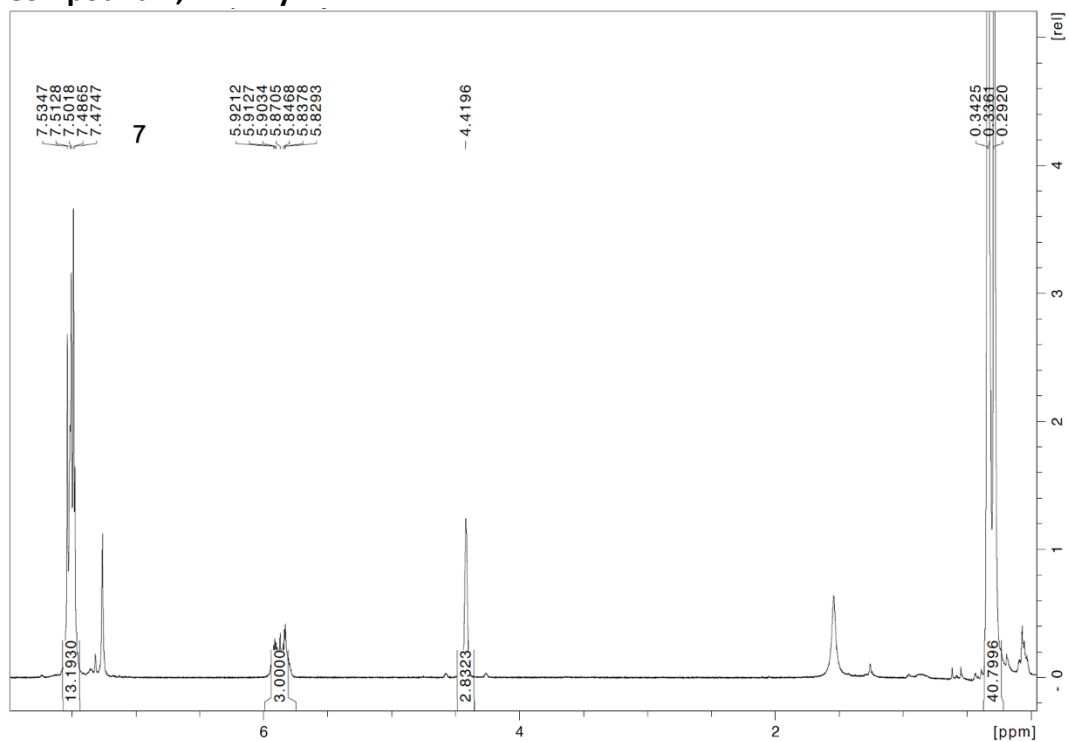

Figure S19. <sup>1</sup>H NMR spectra for compound 7.

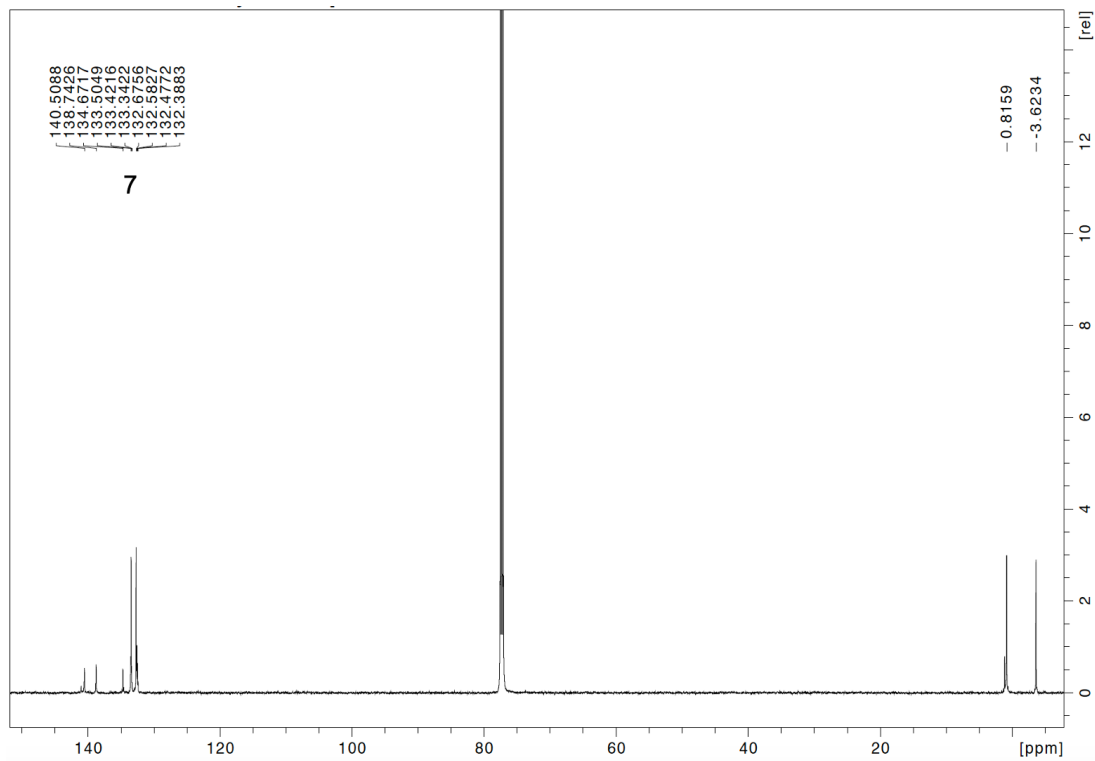

Figure S20. <sup>13</sup>C NMR spectra for compound 7.

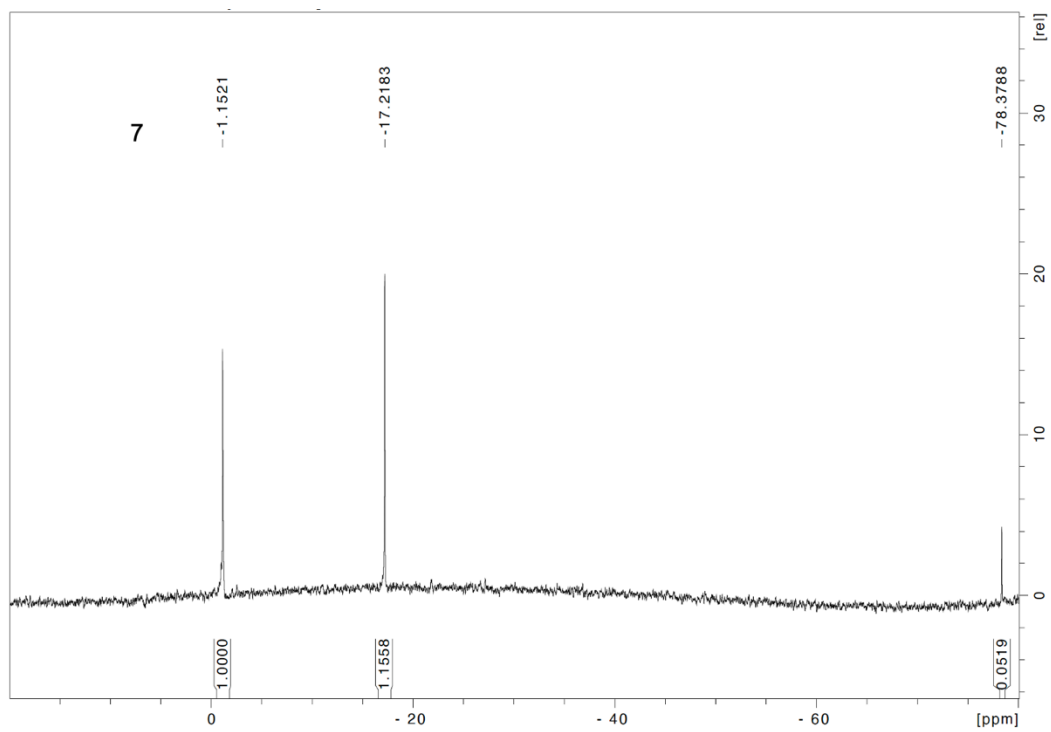

Figure S21.  $^{29}\text{Si}$  NMR spectra for compound **7**.

### Compound **8**

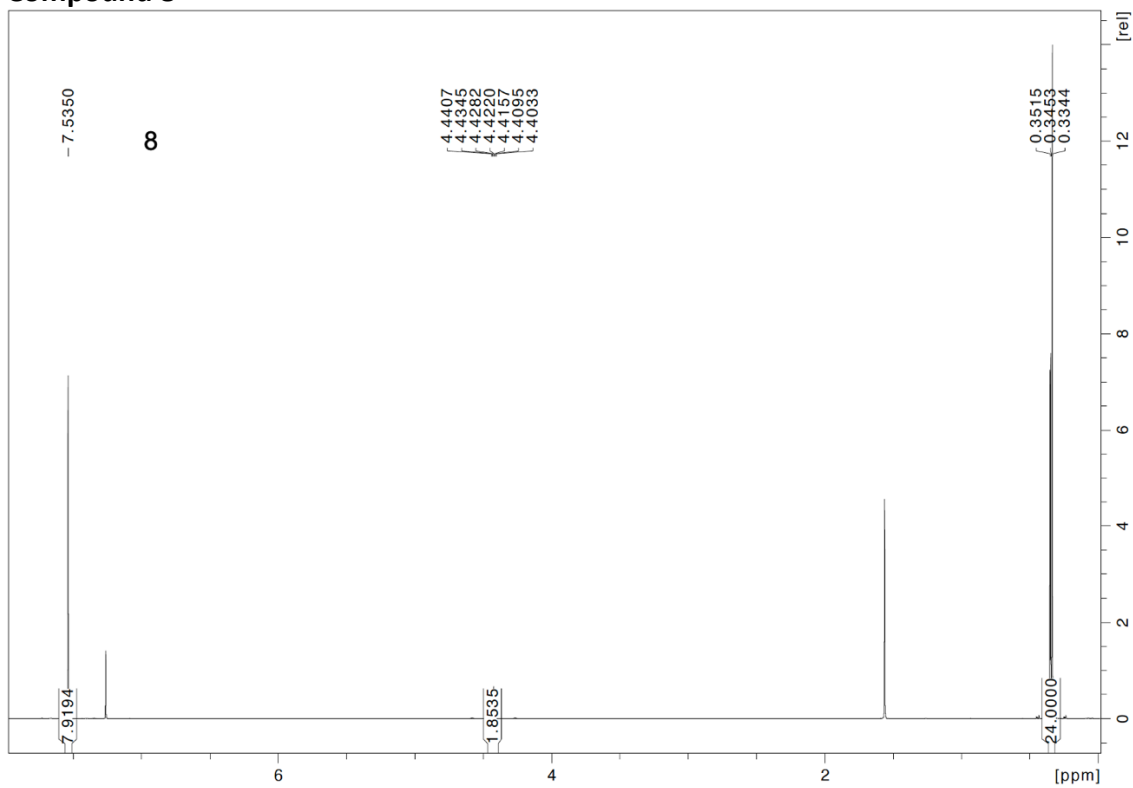

Figure S22.  $^1\text{H}$  NMR spectra for compound **8**.

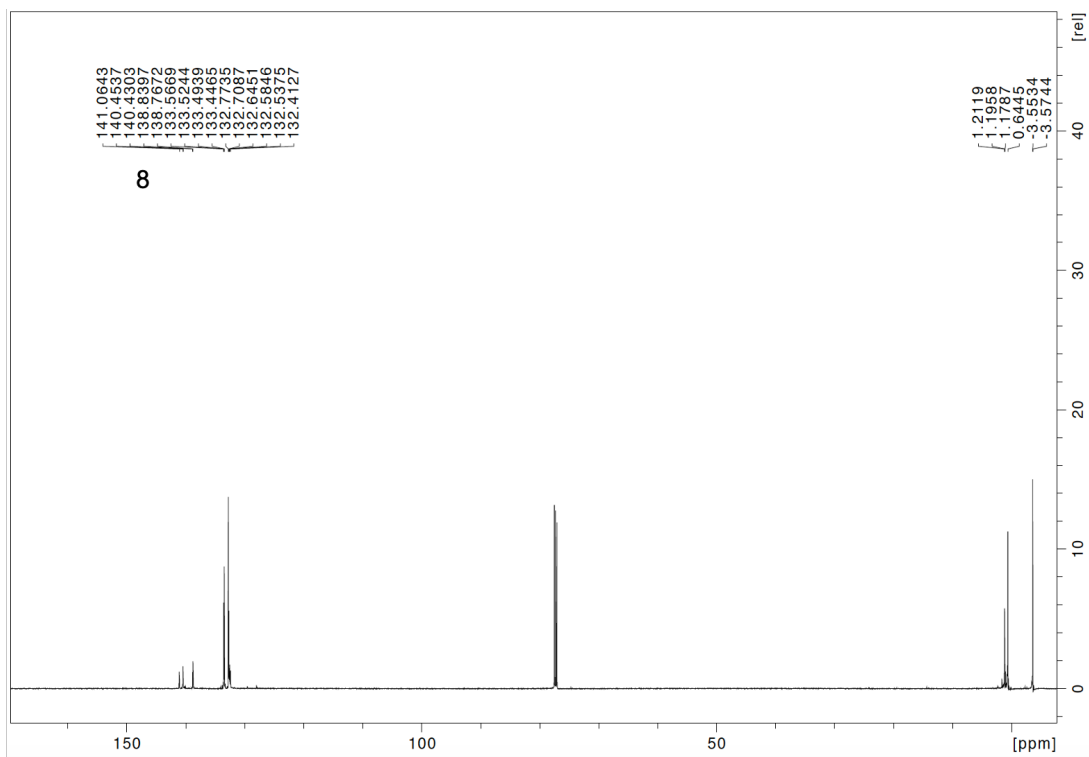

Figure S23.  $^{13}\text{C}$  NMR spectra for compound **8**.

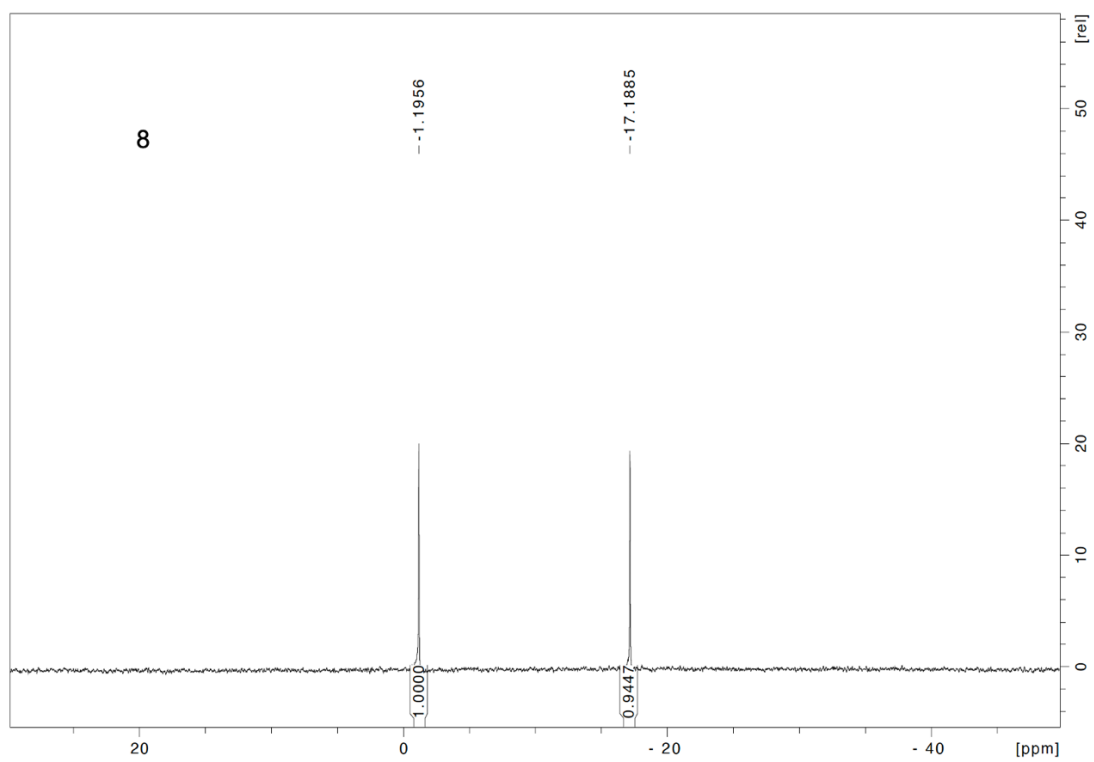

Figure S24.  $^{29}\text{Si}$  NMR spectra for compound **8**.

## Crosslink density by swelling tests for elastomers 10,11

Fresh elastomers were prepared from the precursors **7,8** (~2.0 g) that were transferred into a 20.0 mL glass vial and placed in a 250 °C oven for 10 h (demonstrating in Figure S25).

Elastomer **10** (0.0076 g, 0.011 mmol) was placed into a 20.0 mL glass vial together with hexanes (10 mL). After soaking for 24 h, the weight of swollen **10** was recorded (0.0095 g, 25.0% swelling), and then dried under vacuum at 635 Torr at 60 °C for 6h and the weight of the dry extracted **10** was recorded (0.0051 g, 67.1% drying).

The procedure was repeated with **11** (0.0056 g, 0.0065 mmol); swollen **11** (0.0082 g, 46.4% swelling); dry extracted (0.0040 g, 71.4% drying, Table S1).

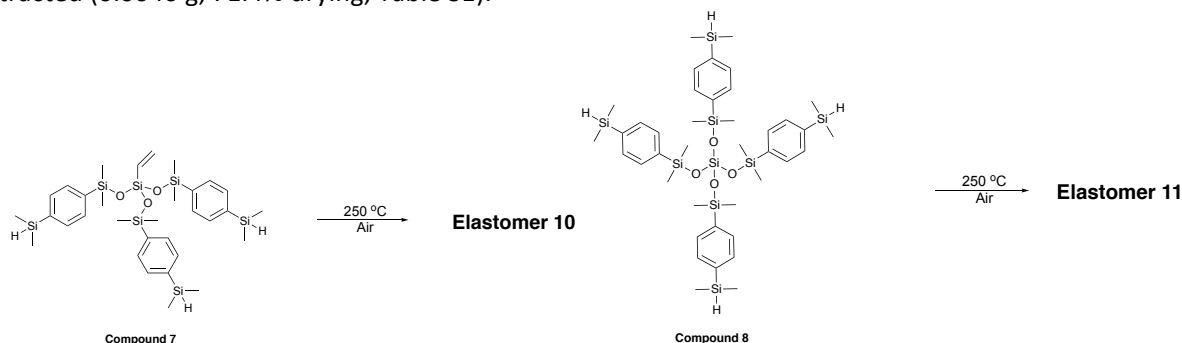

Figure S25. Elastomer synthesis using different silphenylene resin precursors

### Swelling (%) and drying (%)

a) The swelling (%) is defined by Equation S1:

$$\text{Swelling (\%)} = (M_w - M_i) / M_i \times 100 \quad \text{Equation S1}$$

Where  $M_i$  is the pristine elastomer mass,  $M_w$  is the after mass of the swelling elastomer after soaking in hexanes for 24h.

b) The drying (%) is defined by Equation S2:

$$\text{Drying (\%)} = M_w / M_i \times 100 \quad \text{Equation S2}$$

Where  $M_i$  is the pristine elastomer mass,  $M_w$  is the after mass of the swelling elastomers drying under vacuum at 60 °C for 6h.

### Crosslink density calculation

The calculation of the crosslinked density was based on the reported literature.<sup>1, 2</sup>

a) The volume fraction of silicone in the swollen mass ( $\phi$ ) is calculated using Equation S3.

$$\phi = M_w / \rho_2 / [(M_w - M_i) / \rho_1 + M_w / \rho_2] \quad \text{Equation S3}$$

Where:

$M_w$  is the after mass of the swelling elastomer after soaking in hexanes for 24h;  $M_i$  is the after mass of the swelling elastomers drying under vacuum at 60 °C for 6h;  $\rho_1$  is the density of hexanes (0.66 g mL<sup>-1</sup>);  $\rho_2$  is the density of silicone (0.96 g mL<sup>-1</sup>).

b) The average molecular weight between the crosslinking points ( $M_c$ ) is determined by Equation S4.

$$M_c = -\rho_2 V (\phi^{1/3} - \phi/2) / [\ln(1-\phi) + \phi + \chi \phi^2] \quad \text{Equation S4}$$

Where:

$\rho_2$  is the density of silicone (0.96 g mL<sup>-1</sup>);  $V$  is the molar volume of hexanes (130.6 mL mol<sup>-1</sup>);  $\phi$  is the volume fraction of silicone in the swollen mass;  $\chi$  is the Flory-Huggins parameter for crosslinked silicone and hexanes (0.40).<sup>3</sup>

c) The crosslink density ( $\nu$ ) is calculated by Equation S5 as illustrated:

$$\nu = \rho_1 / M_c \quad \text{Equation S5}$$

Where:

$\rho_1$  is the density of hexanes (0.66 g mL<sup>-1</sup>);  $M_c$  is the average molecular weight between the crosslinking points.

Table S1. Crosslink densities of the elastomers when swollen at equilibrium

| Elastomers   | $m_{\text{as prepared}}$<br>(g) | $m_{\text{swelling-24h}}$<br>(g) | Swelling<br>(%) | $m_{\text{drying-6h}}$ (g) | Drying<br>(%) | $\Phi$ | $M_c$<br>(g mol <sup>-1</sup> ) | $\nu \times 10^3$<br>(mol mL) |
|--------------|---------------------------------|----------------------------------|-----------------|----------------------------|---------------|--------|---------------------------------|-------------------------------|
| Elastomer 10 | 0.0076                          | 0.0095                           | 86.3            | 0.0051                     | 67.1          | 0.443  | 1061.157                        | 0.622                         |
| Elastomer 11 | 0.0056                          | 0.0082                           | 105.0           | 0.0040                     | 71.4          | 0.396  | 1482.765                        | 0.445                         |

1. S. Zheng, M. Zlatin, P. R. Selvaganapathy and M. A. Brook, *Add. Manuf.*, 2018, **24**, 86-92.
2. R. L. Hauser, C. Walker and F. L. Kilbourne, *Ind. Eng. Chem.*, 1956, **48**, 1202-1208.
3. J. Mazan, B. Leclerc, H. Porte, G. Torres and G. Couarraze, *J. Mater. Sci. Mater. Med.*, 1993, **4**, 175-178.
